# Supplementary material
Source: PubMed Central journal article supplement (PMC6322022)
Supplement: AnnalsATS.201803-199OC_peltan_data_supplement.pdf [file AnnalsATS.201803-199OC_peltan_data_supplement.pdf]

## **DATA SUPPLEMENT**

### **PREHOSPITAL CARE AND EMERGENCY DEPARTMENT DOOR-TO- ANTIBIOTIC TIME IN SEPSIS**

Ithan D. Peltan, MD, MSc, Kristina H. Mitchell, MD, Kristina E. Rudd, MD, MPH, Blake A. Mann, MD, David J. Carlbom, MD, Thomas D. Rea, MD, Allison M. Butler, MS, Catherine L. Hough, MD, MSc, Samuel M. Brown, MD, MS

**Supplemental methods.**

**Table E1.** Terms or phrases in emergency department chief complaints indicative of suspicion or diagnosis of sepsis or infection at ED triage

| ED chief complaint                                           | Number of subjects* |
|--------------------------------------------------------------|---------------------|
| Sepsis or septic shock                                       | 50                  |
| Fever                                                        | 37                  |
| Rigors or chills                                             | 10                  |
| Cough                                                        | 13                  |
| Dysuria                                                      | 1                   |
| Named specific source of infection                           | 41                  |
| Total subjects with ED chief complaints indicative of sepsis | 117/361             |

\* Some subjects had >1 triage chief complaint component consistent with suspicion or diagnosis of sepsis or infection

Propensity score analysis

Propensity scores provide the probability of treatment assignment based on known baseline characteristics, offering a useful if still imperfect method to mitigate the risk of confounding by indication in an observational analysis of different treatment strategies or processes (1-3). We conducted two propensity score-based sensitivity analyses. Since walk-in, BLS, and ALS care provide an ordered sequence of prehospital care intensity, propensity scores for prehospital care level (walk-in, BLS, or ALS) were fit using a proportional odds logistic regression model for the 361 community-dwelling patients in the primary analysis (4,5). Predictor variables included in the model were source of infection (pneumonia, intraabdominal/gastrointestinal, skin or soft tissue, urinary tract, unknown/other/no source); nighttime ED arrival; Hispanic ethnicity or non-white race; age; Charlson comorbidity index; and first-available GCS; systolic blood pressure; and respiratory rate. The prehospital care level propensity score for each study subject was calculated as the logit of the first fitted values of the proportional odds logistic regression model. Since this model is constrained to have the odds be proportional between each level, all necessary information is contained in the first fitted value. The distribution of generated propensity scores is shown in Table E2 and Figure E1.

**Table E2.** Summary statistics of generated propensity scores

| EMS level             | N (%)       | Mean | St.Dev | Min  | Max |
|-----------------------|-------------|------|--------|------|-----|
| Walk-in               | 101 (28%)   | -0.5 | 0.8    | -3.2 | 1.2 |
| Basic Life Support    | 111 (30.7%) | -0.8 | 1.1    | -4.5 | 1.1 |
| Advanced Life Support | 149 (41.3%) | -2.3 | 1.4    | -6.8 | 0.6 |
| Total                 | 361 (100%)  | -1.4 | 1.4    | -6.8 | 1.2 |

**Figure E1.** Distribution of propensity scores by actual level of prehospital care.

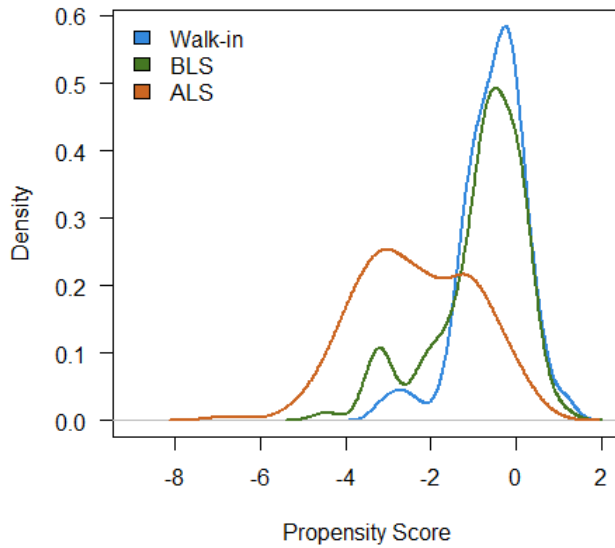

The propensity scores were used in two analyses . First, we repeated the primary analysis using stabilized inverse probability of treatment weighting (IPTW) based on a propensity score (28,29). Standardized between-group differences for model covariates before and after stabilized IPTW are shown in Table E3 and demonstrates good improvement in standardized differences after IPTW. The IPTW model, which included the MEDS score as an independent covariate, assigned each subject a regression weight inverse to that subject’s probability of receiving each level of care, thereby balancing covariate distributions across prehospital treatment levels. Stabilization of weights was achieved by using the mean treatment level probability (rather than unity) as the numerator for regression weight calculation.

**Table E3.** Standardized differences in model covariates before and after inverse probability of treatment weighting

| Variable                      | Standardized differences |       |                    |       |                |       |
|-------------------------------|--------------------------|-------|--------------------|-------|----------------|-------|
|                               | Walk-in vs BLS           |       | Walk-in versus BLS |       | BLS versus ALS |       |
|                               | Simple                   | IPTW  | Simple             | IPTW  | Simple         | IPTW  |
| Charlson index                | 0.079                    | 0.082 | 0.078              | 0.008 | 0.003          | 0.091 |
| Age                           | 0.442                    | 0.267 | 0.266              | 0.093 | 0.169          | 0.361 |
| First systolic blood pressure | 0.063                    | 0.040 | 0.374              | 0.099 | 0.423          | 0.126 |
| First respiratory rate        | 0.079                    | 0.021 | 0.334              | 0.246 | 0.361          | 0.204 |
| Nighttime ED arrival          | 0.299                    | 0.327 | 0.325              | 0.155 | 0.025          | 0.170 |
| Female sex                    | 0.130                    | 0.244 | 0.137              | 0.082 | 0.268          | 0.327 |
| Non-white race or Hispanic    | 0.131                    | 0.087 | 0.289              | 0.040 | 0.156          | 0.046 |
| GCS $\leq$ 13                 | 0.258                    | 0.003 | 1.17               | 0.092 | 0.891          | 0.089 |
| Infection source-Pneumonia    | 0.435                    | 0.550 | 0.334              | 0.387 | 0.687          | 0.546 |

For the linear regression model with propensity score adjustment sensitivity analysis, the propensity score and MEDS score were employed as the adjustment variables for the prehospital level of care exposure of interest (6).

## REFERENCES

1. Haukoos JS, Lewis RJ. The propensity score. *JAMA* 2015;314:1637–1638.
2. Austin PC. An introduction to propensity score methods for reducing the effects of confounding in observational studies. *Multivariate Behav Res* 2011;46:399–424.
3. Braitman LE, Rosenbaum PR. Rare outcomes, common treatments: analytic strategies using propensity scores. *Ann Intern Med* 2002;137:693–695.
4. Imbens GW. The role of the propensity score in estimating dose-response functions. *Biometrika* 2000;87:706–710.
5. Zanutto E, Lu B, Hornik R. Using propensity score subclassification for multiple treatment doses to evaluate a national antidrug media campaign. *J Educ Behav Stat* 2016;30:59–73.
6. Rosenbaum PR, Rubin DB. The central role of the propensity score in observational studies for causal effects. *Biometrika* 1983;70:41–55.

**Figure E2.** Subject inclusion flow diagram

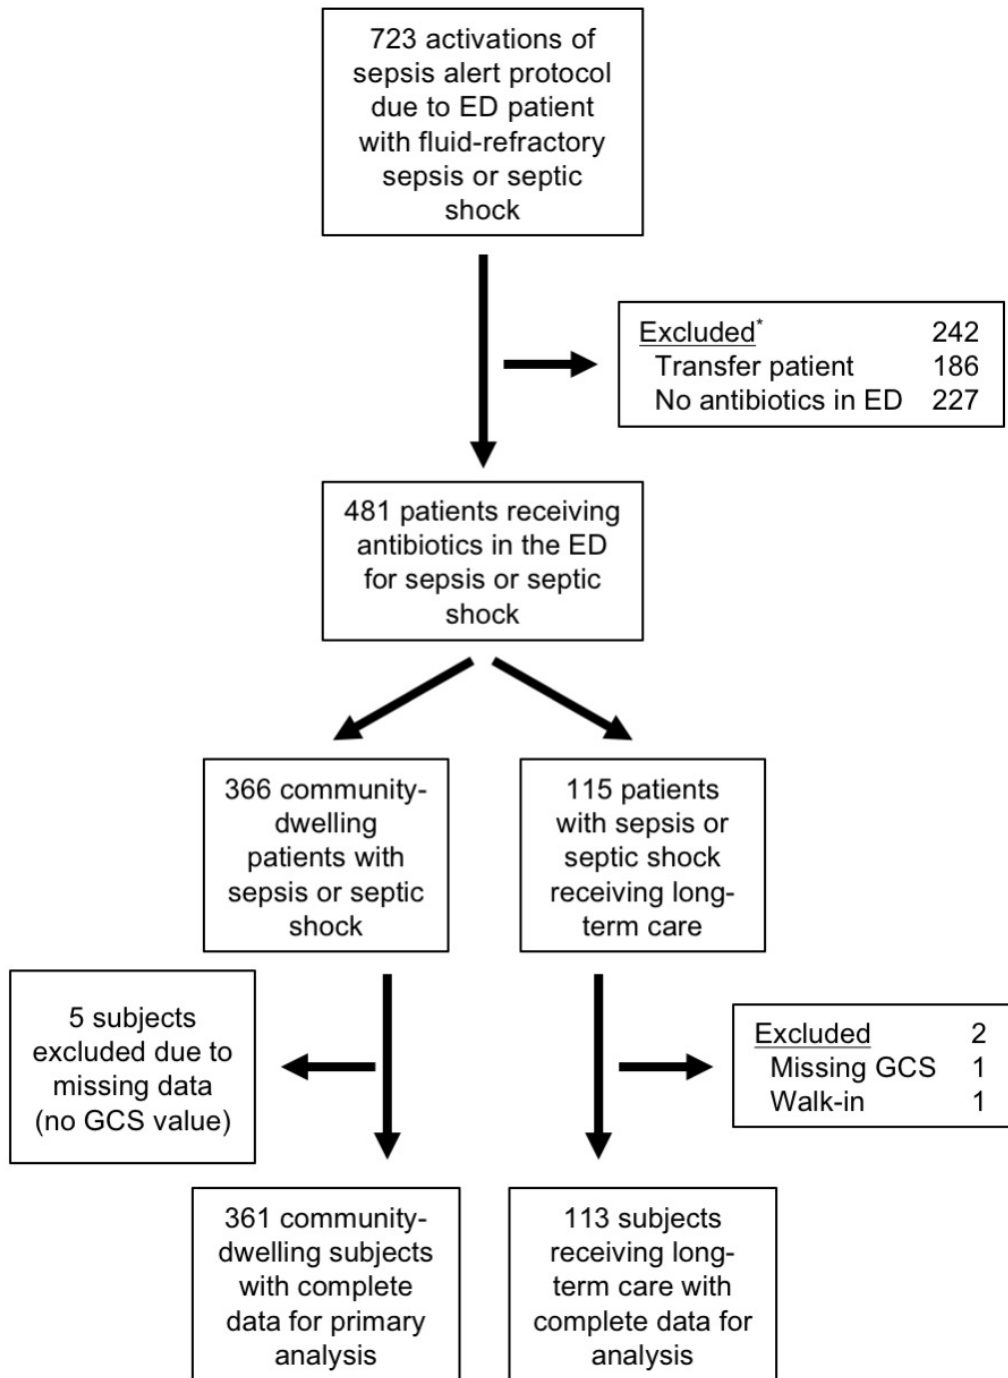

\* Some subjects met both exclusion criteria

**Table E4.** Demographic and clinical characteristics by level of prehospital care for sepsis patients sent from long-term care facilities

|                                      | Basic life support<br>(N=44) | Advanced life support<br>(N=69) |
|--------------------------------------|------------------------------|---------------------------------|
| Age                                  | 61.8 (17.8)                  | 63.3 (14.3)                     |
| Female sex                           | 18 (40.9%)                   | 22 (31.9%)                      |
| Non-white race or Hispanic           | 20 (45.5%)                   | 26 (37.7%)                      |
| Prehospital care                     |                              |                                 |
| Prehospital IV access                | 0 (0%)                       | 53 (76.8%)                      |
| Prehospital shock                    | 15 (34.1%)                   | 36 (52.2%)                      |
| EMS scene to ED arrival (mins)       | 34.3 (18.3)                  | 39.5 (13.9)                     |
| Infection source                     |                              |                                 |
| Pneumonia                            | 13 (29.6%)                   | 26 (37.7%)                      |
| Soft tissue infection                | 7 (15.9%)                    | 8 (11.6%)                       |
| Intraabdominal infection             | 3 (6.8%)                     | 3 (4.3%)                        |
| Urinary tract infection              | 18 (40.9%)                   | 22 (31.9%)                      |
| Other/unknown                        | 3 (6.8%)                     | 10 (14.5%)                      |
| ED admission data                    |                              |                                 |
| Hypotension by ED arrival*           | 21 (47.7%)                   | 43 (62.3%)                      |
| First Glasgow Coma Score*            | 14 (8.5-15)                  | 8 (4-13)                        |
| Lactate (mmol/L)                     | 3 (1.9-4.95)                 | 4.5 (2.9-7.3)                   |
| White blood count (1000/dL)          | 14.7 (7.9)                   | 13.9 (8.3)                      |
| SOFA score                           | 3 (1-4.5)                    | 6 (4-8)                         |
| ED management data                   |                              |                                 |
| Total IV fluid (L)*                  | 4.0 (3.0-5.0)                | 4.0 (3.0-5.0)                   |
| Vasopressors*                        | 9 (20.5%)                    | 27 (39.1%)                      |
| Minutes to antibiotic initiation     | 160 (122)                    | 99 (72)                         |
| Antibiotic initiation $\leq$ 3 hours | 31 (70.5%)                   | 62 (89.9%)                      |
| MEDS score                           | 8.0 (3.5)                    | 10.5 (3.3)                      |
| Charlson comorbidity index           | 2.5 (2.0)                    | 3.0 (2.4)                       |
| Death before discharge               | 9 (20.5%)                    | 15 (21.7%)                      |
| ED length of stay (mins)             | 411 (293-527)                | 270 (203-333)                   |
| Hospital length of stay (days)       | 6.4 (4.0-13.4)               | 6.8 (3.5-11.8)                  |

Values reported as mean (SD), N (%) or median (IQR).

\* Includes all care in both ED and prehospital setting

Abbreviations: ED, emergency department; EMS, emergency medical services; IV, intravenous; MEDS score, Mortality in Emergency Department Sepsis score; mins, minutes; SOFA, Sequential Organ Failure Assessment

**Table E5.** Sensitivity analysis using stabilized inverse probability of treatment weighting based on propensity score to assess association of prehospital care with door-to-antibiotic time in community-dwelling sepsis patients

| Variable                                     | Adjusted regression coefficient* (95% CI) | p value             |
|----------------------------------------------|-------------------------------------------|---------------------|
| Level of prehospital care                    |                                           | <0.001 <sup>†</sup> |
| Basic life support vs no prehospital care    | 15.3 (-18.4, 51.0)                        | 0.51 <sup>‡</sup>   |
| Advanced life support vs no prehospital care | -37.7 (-71.0, -4.3)                       | 0.022 <sup>‡</sup>  |
| Advanced life support vs basic life support  | -54.0 (-85.6, -22.3)                      | <0.001 <sup>‡</sup> |
| MEDS score                                   | -9.0 (-12.1, -6.0)                        | <0.001              |

Abbreviations: CI, confidence interval; MEDS score, Mortality in Emergency Department Sepsis score

\* Expected change in door-to-antimicrobial time for a one unit change in exposure variable.

<sup>†</sup> Result of F-test to assess overall significant effect of prehospital level of care on door-to-antibiotic time.

<sup>‡</sup> Confidence intervals and p values adjusted for multiple comparisons using Tukey's multiple comparisons correction.

**Table E6.** Sensitivity analysis using propensity score adjustment to assess association of prehospital care with door-to-antibiotic time in community-dwelling sepsis patients

| Variable                                     | Adjusted regression coefficient* (95% CI) | p value            |
|----------------------------------------------|-------------------------------------------|--------------------|
| Level of prehospital care                    |                                           | 0.007 <sup>†</sup> |
| Basic life support vs no prehospital care    | 4.6 (-31.5, 40.7)                         | 0.95 <sup>‡</sup>  |
| Advanced life support vs no prehospital care | -43.2 (-83.3, -3.0)                       | 0.032 <sup>‡</sup> |
| Advanced life support vs basic life support  | -47.8 (-84.9, -10.6)                      | 0.008 <sup>‡</sup> |
| MEDS score                                   | -6.3 (-9.9, -2.7)                         | <0.001             |
| Propensity score                             | 10.6 (-0.26, 21.4)                        | 0.056              |

Abbreviations: CI, confidence interval; MEDS score, Mortality in Emergency Department Sepsis score

\* Expected change in door-to-antimicrobial time for a one unit change in exposure variable.

<sup>†</sup> Result of F-test to assess overall significant effect of prehospital level of care on door-to-antibiotic time.

<sup>‡</sup> Confidence intervals and p values adjusted for multiple comparisons using Tukey's multiple comparisons correction.



**Table E7.** Adjusted association of prehospital care with door-to-antibiotic time in community-dwelling sepsis patients without hypotension by ED arrival

| Variable                                     | Adjusted difference in<br>door-to-antibiotic<br>time*<br>(95% CI) | p value           |
|----------------------------------------------|-------------------------------------------------------------------|-------------------|
| Overall comparison                           |                                                                   | 0.24 <sup>†</sup> |
| Basic life support vs no prehospital care    | -10.4 (-63.6, 42.8)                                               | 0.89 <sup>‡</sup> |
| Advanced life support vs no prehospital care | -45.6 (-110.1, 19.0)                                              | 0.22 <sup>‡</sup> |
| Advanced life support vs basic life support  | -35.2 (-99.0, 28.7)                                               | 0.40 <sup>‡</sup> |

Abbreviation: CI, confidence interval

\* Adjusted for nighttime emergency department arrival, Mortality in ED Sepsis score, source of infection, Hispanic ethnicity or non-white race, age, Charlson comorbidity index, first-available Glasgow Coma Score, and first-available respiratory rate.

<sup>†</sup> Result of F-test to assess overall significant effect of prehospital level of care on door-to-antibiotic time.

<sup>‡</sup> Confidence intervals and p values adjusted for multiple comparisons using Tukey's multiple comparisons correction.

**Table E8.** Adjusted association of prehospital care with door-to-antibiotic time in community-dwelling sepsis patients with hypotension by ED arrival

| Variable                                     | Adjusted difference in<br>door-to-antibiotic<br>time*<br>(95% CI) | p value            |
|----------------------------------------------|-------------------------------------------------------------------|--------------------|
| Overall comparison                           |                                                                   | 0.032 <sup>†</sup> |
| Basic life support vs no prehospital care    | 42.3 (-3.0, 87.5)                                                 | 0.073 <sup>‡</sup> |
| Advanced life support vs no prehospital care | 4.4 (-38.9, 47.8)                                                 | 0.97 <sup>‡</sup>  |
| Advanced life support vs basic life support  | -37.8 (-76.1, 0.4)                                                | 0.053 <sup>‡</sup> |

Abbreviation: CI, confidence interval

\* Adjusted for nighttime emergency department arrival, Mortality in ED Sepsis score, source of infection, Hispanic ethnicity or non-white race, age, Charlson comorbidity index, first-available Glasgow Coma Score, and first-available respiratory rate.

<sup>†</sup> Result of F-test to assess overall significant effect of prehospital level of care on door-to-antibiotic time.

<sup>‡</sup> Confidence intervals and p values adjusted for multiple comparisons using Tukey's multiple comparisons correction.

**Table E9.** Interaction between hypotension by ED arrival and prehospital care with door-to-antibiotic time in community-dwelling sepsis patients

| Variable                                        | Adjusted difference in door-to-antibiotic time* (95% CI) | p value             |
|-------------------------------------------------|----------------------------------------------------------|---------------------|
| Interaction of prehospital care and hypotension |                                                          | 0.033 <sup>†</sup>  |
| With versus without hypotension by ED arrival   |                                                          |                     |
| No prehospital care                             | -95.2 (-151.5, -38.8)                                    | <0.001 <sup>‡</sup> |
| Basic life support                              | -47.7 (-92.3, -2.3)                                      | 0.038 <sup>‡</sup>  |
| Advanced life support                           | -9.0 (-52.4, 34.4)                                       | 0.69 <sup>‡</sup>   |
| No hypotension by ED arrival                    |                                                          |                     |
| Basic life support vs no prehospital care       | -8.9 (-51.9, 34.2)                                       | 0.88 <sup>‡</sup>   |
| Advanced life support vs no prehospital care    | -61.4 (-110.1, -12.6)                                    | 0.009 <sup>‡</sup>  |
| Advanced life support vs basic life support     | -52.5 (-101.3, -4.7)                                     | 0.032 <sup>‡</sup>  |
| Hypotension by ED arrival                       |                                                          |                     |
| Basic life support vs no prehospital care       | 38.9 (-32.8, 110.6)                                      | 0.41 <sup>‡</sup>   |
| Advanced life support vs no prehospital care    | 24.9 (-42.5, 92.2)                                       | 0.66 <sup>‡</sup>   |
| Advanced life support vs basic life support     | -14 (-70.0, 40.9)                                        | 0.82 <sup>‡</sup>   |

Abbreviation: CI, confidence interval; ED, emergency department

\* Adjusted for nighttime emergency department arrival, Mortality in ED Sepsis score, source of infection, Hispanic ethnicity or non-white race, age, Charlson comorbidity index, hypotension by ED arrival, first-available Glasgow Coma Score, and first-available respiratory rate.

<sup>†</sup> Result of F-test to assess overall significant effect of interaction term between prehospital level of care and hypotension by ED arrival.

<sup>‡</sup> Confidence intervals and p values adjusted for multiple comparisons using Tukey's multiple comparisons correction.
